# Supplementary material for: Dysregulation of N6-methyladenosine regulators predicts poor patient survival in mantle cell lymphoma
Source: PubMed Central journal article supplement — Oncol Lett. 2019 Aug 2;18(4):3682–90. doi: 10.3892/ol.2019.10708 (PMC6732954; doi:10.3892/ol.2019.10708), 2019-08-02

Figure S1. Kaplan-Meier analysis of OS of 123 patients with mantle cell lymphoma and KIAA1429 expression. The log-rank test was used to compare the Kaplan-Meier curves ( $P < 0.0001$ ). KIAA1429-high ( $n=24$ ) and KIAA1429-low ( $n=99$ ) groups were determined using a maximally selected rank statistics algorithm (survminer package). KIAA1429, protein virilizer homolog; overall survival, OS.

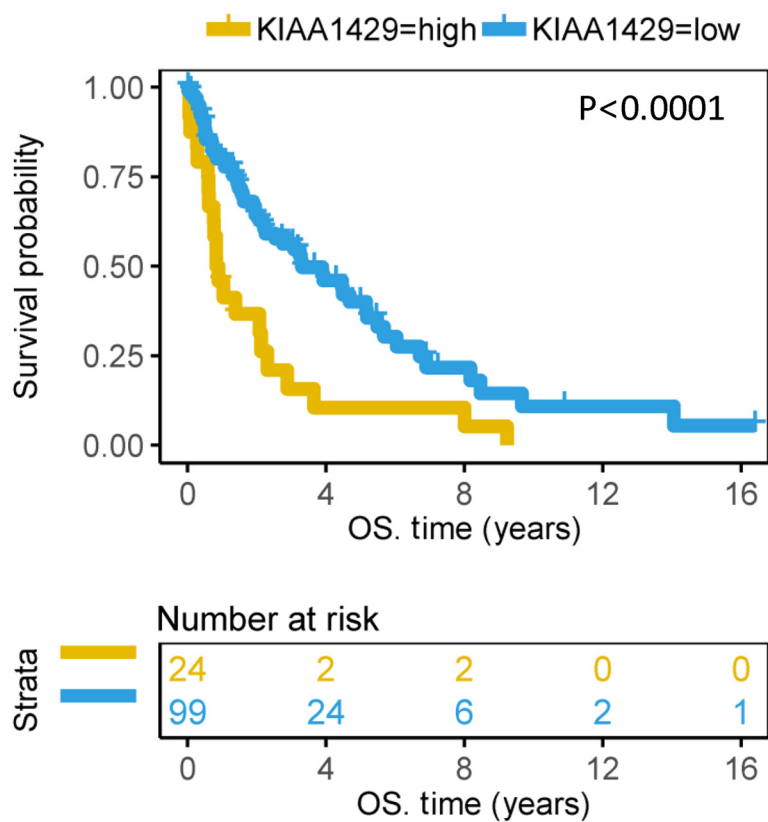

Figure S2. Correlation plot of m<sup>6</sup>A.index and the gene expression of Ki-67 and DNA polymerase genes (POLA1, POLA2, POLD1, POLD2 and POLQ) in 123 MCL samples. (A) Correlation plot of the m<sup>6</sup>A.index with the gene expression of Ki-67 and DNA polymerase genes (POLA1, POLA2, POLD1, POLD2 and POLQ) in 123 MCL samples. The m<sup>6</sup>A.index and gene expression data were log2 transformed. DNA polymerase genes reflect DNA replication and cell proliferation. (B) Spearman correlation coefficient analysis of the association between the m<sup>6</sup>A.index and Ki-67 gene expression in 123 MCL samples. Correlation=-0.52, P<0.001. m<sup>6</sup>A, N<sup>6</sup>-methyladenosine; MKI67, marker of proliferation Ki-67; MCL, mantle cell lymphoma; POLA1, DNA polymerase alpha 1, catalytic subunit; POLA2, DNA polymerase alpha 2, accessory subunit; POLD1, DNA polymerase delta 1, catalytic subunit; POLD2, DNA polymerase delta 2, accessory subunit; POLQ DNA polymerase theta.

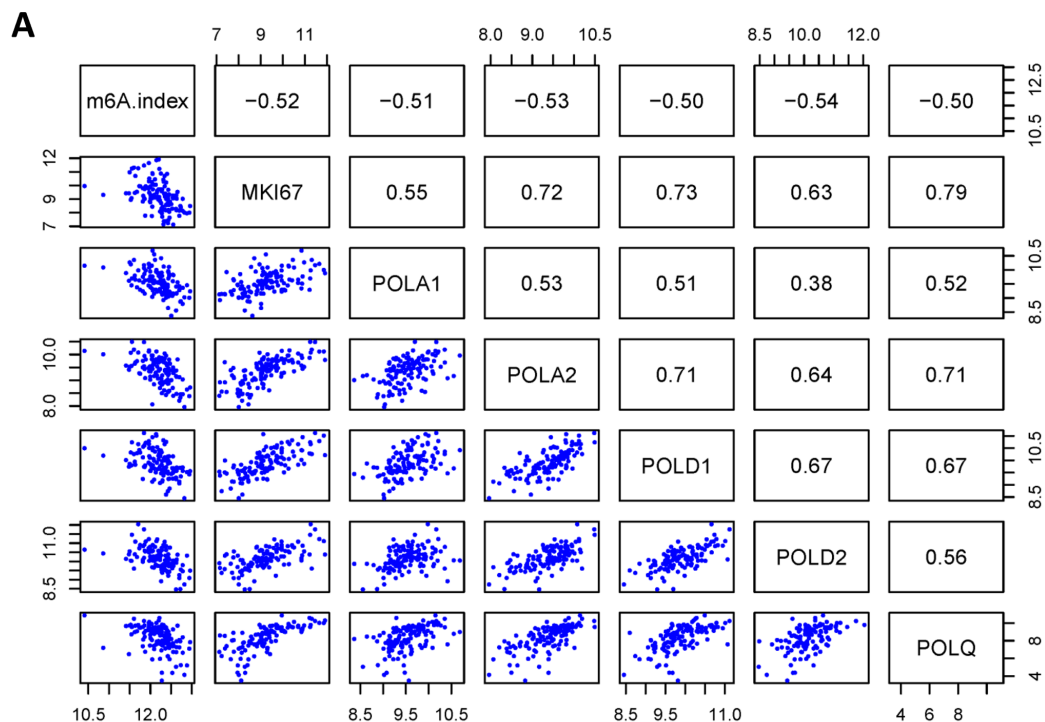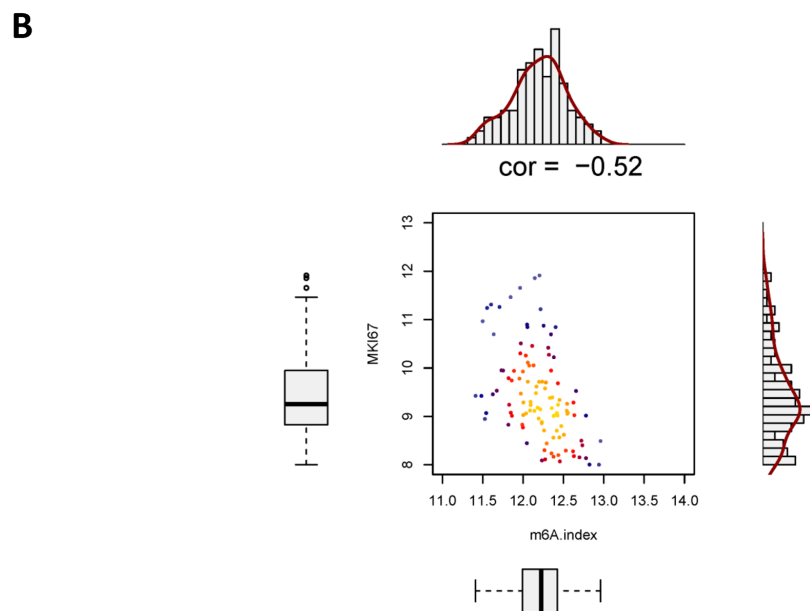

Figure S3. Survival analysis of MKI67, ATM, MYC and TP53 gene expression in 123 patients with mantle cell lymphoma. (A) Survival analysis of MKI67, ATM, MYC and TP53 gene expression in 123 patients with mantle cell lymphoma. (B) ATM ( $P=2.3 \times 10^{-8}$ ), MKI67 ( $P=5.1 \times 10^{-4}$ ), MYC ( $P=2.2 \times 10^{-1}$ ) and TP53 ( $P=4.7 \times 10^{-1}$ ) gene expression levels in the m<sup>6</sup>A.index-high and m<sup>6</sup>A.index-low groups were compared using an unpaired two-sided Student's t-test. MKI67, marker of proliferation 67; ATM, ATM serine/threonine kinase; MYC, MYC proto-oncogene, BHLH transcription factor; TP53, tumor protein 53; m<sup>6</sup>A, N<sup>6</sup>-methyladenosine; CI, confidence interval.

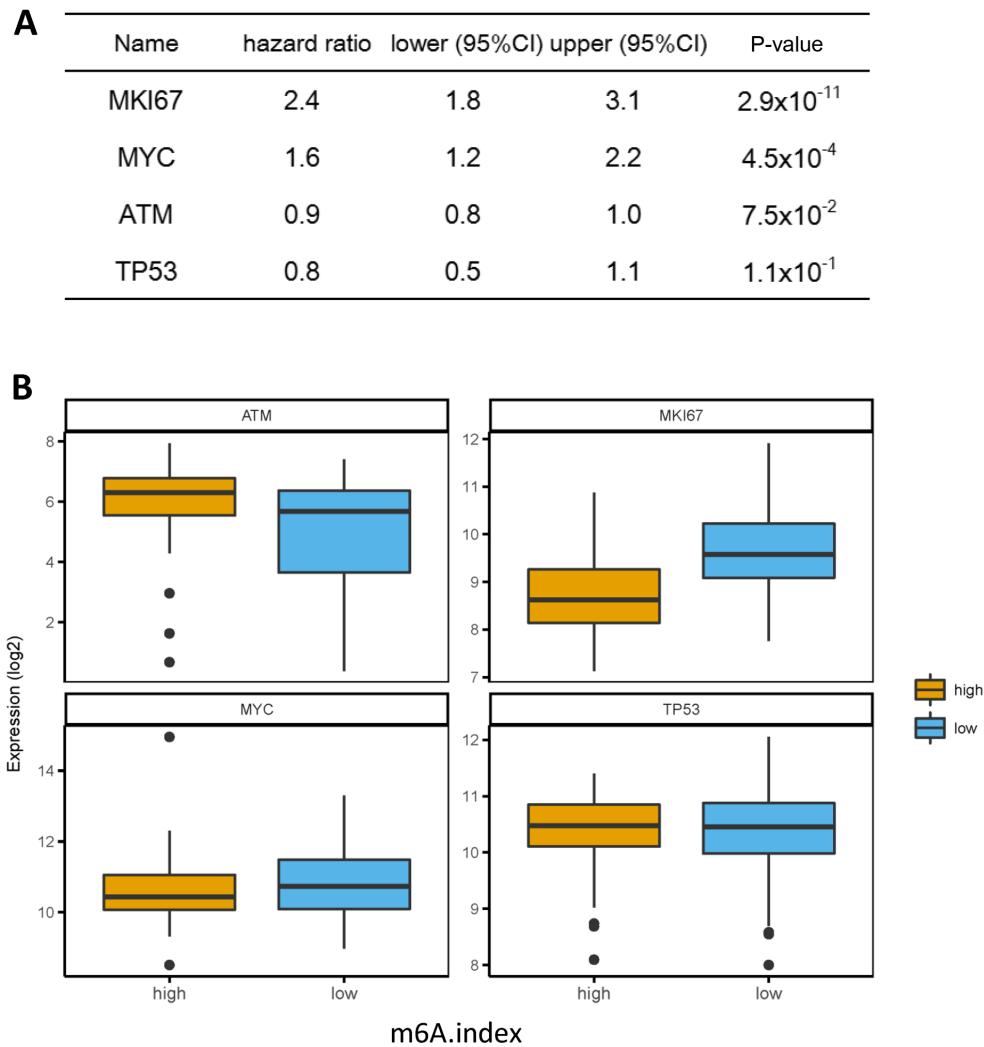

Figure S4. Spearman's correlation coefficient analysis of m<sup>6</sup>A.index with the expression of 17 proliferation-associated genes in 123 MCL samples. The m<sup>6</sup>A.index and 17 genes expression levels were log2 transformed. (A) Correlation between the m<sup>6</sup>A.index and the first 8 genes. (B) Correlation between the m<sup>6</sup>A.index and the remaining 9 genes. m<sup>6</sup>A, N<sup>6</sup>-methyladenosine.

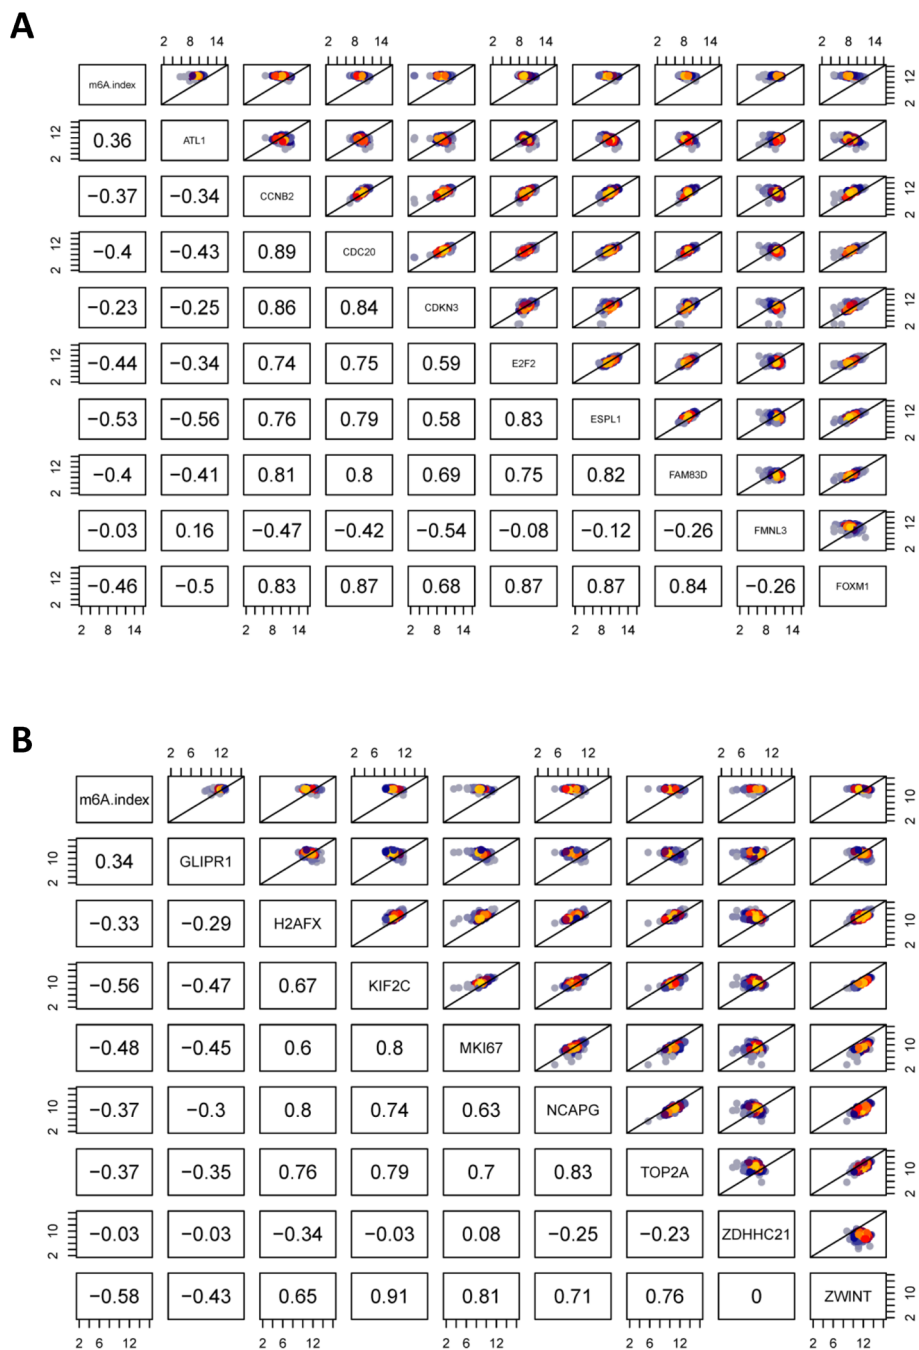

Supplement: Supplementary_Data.pdf [file Supplementary_Data.pdf]
